# Supplementary material for: Identification of Degradation Products of the New Anticancer Drug Substance ONC201 by Liquid Chromatography–High-Resolution Multistage Mass Spectrometry
Source: MDPI journal article supplement (doi:10.3390/chemosensors11050294), 2023-05-15
Supplement: s1 [file s1]

# Identification of Degradation Products of the New Anticancer Drug Substance ONC201 by Liquid Chromatography–High-Resolution Multistage Mass Spectrometry

Maxime Annereau <sup>1,2</sup>, Marina Vignes <sup>1,2</sup>, Tahar Sif Eddine Bouchema <sup>1</sup>, Lucas Denis <sup>2</sup>, Audrey Solgadi <sup>3</sup>, Victoire Vieillard <sup>4</sup>, Muriel Paul <sup>4,5</sup>, André Rieutord <sup>2</sup>, Jacques Grill <sup>6,7</sup>, Philippe-Henri Secretan <sup>1,\*</sup> and Bernard Do <sup>1,4,\*</sup>

<sup>1</sup> Université Paris-Saclay, Matériaux Et Santé, 91400 Orsay, France

<sup>2</sup> Clinical Pharmacy Department, Gustave Roussy Cancer Campus, 114 rue Edouard Vaillant, 94800 Villejuif, France

<sup>3</sup> Université Paris-Saclay, Inserm, CNRS, Ingénierie et Plateformes au Service de l'Innovation Thérapeutique, 92296 Châtenay-Malabry, France

<sup>4</sup> Department of Pharmacy, Henri Mondor Hospital, AP-HP, 94000, Créteil, France

<sup>5</sup> EpidermE, Université Paris Est Creteil, 94010 Creteil, France

<sup>6</sup> Molecular Predictors and New Targets in Oncology, INSERM, Gustave Roussy, Université Paris-Saclay, 94800, Villejuif, France

<sup>7</sup> Département de Cancérologie de l'Enfant et de l'Adolescent, Gustave Roussy, Université Paris-Saclay, 94800, Villejuif, France

\* Correspondence: philippe-henri.secretan@universite-paris-saclay.fr (P.-H.S.); bernard.do@aphp.fr (B.D.)

## Table of contents

|                                                                                                                     |    |
|---------------------------------------------------------------------------------------------------------------------|----|
| List of table .....                                                                                                 | 3  |
| List of figures .....                                                                                               | 3  |
| Table .....                                                                                                         | 4  |
| Figures .....                                                                                                       | 7  |
| LC-MS-HRMS spectral data of protonated ONC201.....                                                                  | 7  |
| LC-MS-HRMS spectral data of the protonated degradation products (DP) formed under photolytic stress conditions..... | 8  |
| LC-MS-HRMS spectral data of the protonated degradation products (DP) formed under oxidative stress conditions.....  | 11 |

## List of table

|                                                                                                                                                                                             |   |
|---------------------------------------------------------------------------------------------------------------------------------------------------------------------------------------------|---|
| Table S1 : relative retention time, name, structures, molecular formula, stress factor(s) leading to DP formation and results of the in silico assessment for the identified compounds..... | 4 |
|---------------------------------------------------------------------------------------------------------------------------------------------------------------------------------------------|---|

## List of figures

|                                                                                                                                           |    |
|-------------------------------------------------------------------------------------------------------------------------------------------|----|
| Figure S1: Degradation kinetics of ONC201. Inset (a) under photolytic conditions. Inset (b) under oxidizing conditions.....               | 7  |
| Figure S2: LC-MS-HRMS mass spectra of protonated ONC201.....                                                                              | 7  |
| Figure S3: LC-MS-HRMS mass spectra of protonated DP189.....                                                                               | 8  |
| Figure S4: LC-MS-HRMS mass spectra of protonated DP292.....                                                                               | 8  |
| Figure S5: LC-MS-HRMS mass spectra of protonated DP382.....                                                                               | 9  |
| Figure S6: LC-MS-HRMS mass spectra of protonated DP384.....                                                                               | 9  |
| Figure S7: LC-MS-HRMS mass spectra of protonated DP398.....                                                                               | 10 |
| Figure S8: LC-MS-HRMS mass spectra of protonated DP418.....                                                                               | 10 |
| Figure S9: LC-MS-HRMS mass spectra of protonated DP390.....                                                                               | 11 |
| Figure S10: LC-MS-HRMS mass spectra of protonated DP402.....                                                                              | 11 |
| Figure S11: LC-MS-HRMS mass spectra of protonated DP406.....                                                                              | 12 |
| Figure S12: a. LC-MS-HRMS mass spectrum of protonated DP418 b. LC-MS <sup>2</sup> -HRMS mass spectrum of m/z 284 of protonated DP418..... | 12 |
| Figure S13: LC-MS-HRMS mass spectra of protonated DP420.....                                                                              | 13 |

Table

Table S1 : relative retention time, name, structures, molecular formula, stress factor(s) leading to DP formation and results of the *in silico* assessment for the identified compounds

| Relative retention time | Name          | Structure                                                                           | Molecular formula                                             | Stress factor(s) leading to DP Formation | Mutagenicity  |                     | ICH M7 class   |
|-------------------------|---------------|-------------------------------------------------------------------------------------|---------------------------------------------------------------|------------------------------------------|---------------|---------------------|----------------|
|                         |               |                                                                                     |                                                               |                                          | QSAR software | Rule based software |                |
| 1                       | ONC201        | 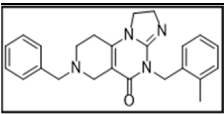   | C <sub>24</sub> H <sub>26</sub> N <sub>4</sub> O              |                                          | No            | Yes                 | Not applicable |
| 0.86                    | DP390         |    | C <sub>23</sub> H <sub>26</sub> N <sub>4</sub> O <sub>2</sub> | Oxydative                                | No            | Yes*                | Class 4        |
| 0.86                    | ONC201 isomer |   | C <sub>24</sub> H <sub>26</sub> N <sub>4</sub> O              | Light                                    | Yes           | No                  | Class 3        |
| 0.92                    | DP189         |  | C <sub>11</sub> H <sub>15</sub> N <sub>3</sub>                | Oxydative and light                      | No            | No                  | Class 5        |
| 0.99                    | DP402-1       |  | C <sub>24</sub> H <sub>26</sub> N <sub>4</sub> O <sub>2</sub> | Oxydative                                | No            | Yes*                | Class 4        |
| 0.99                    | DP402-2       |  | C <sub>24</sub> H <sub>26</sub> N <sub>4</sub> O <sub>2</sub> | Oxydative                                | Yes           | Yes**               | Class 3        |
| 0.99                    | DP420         |  | C <sub>24</sub> H <sub>28</sub> N <sub>4</sub> O <sub>3</sub> | Oxydative                                | No            | No                  | Class 5        |
| 1.05                    | DP292         |  | C <sub>17</sub> H <sub>16</sub> N <sub>4</sub> O              | Light                                    | Yes           | No                  | Class 3        |
| 1.05                    | DP436         |  | C <sub>24</sub> H <sub>28</sub> N <sub>4</sub> O <sub>4</sub> | Oxydative                                | Yes           | No                  | Class 3        |
| 1.13                    | DP418         |  | C <sub>24</sub> H <sub>26</sub> N <sub>4</sub> O <sub>3</sub> | Oxydative                                | No            | Yes*                | Class 4        |

|      |         |                                                                                     |                      |                        |                   |      |         |
|------|---------|-------------------------------------------------------------------------------------|----------------------|------------------------|-------------------|------|---------|
| 1.24 | DP418-1 | 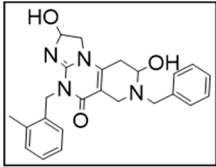   | $C_{24}H_{26}N_4O_3$ | Oxydative<br>and light | Not<br>applicable | Yes* | Class 3 |
| 1.26 | DP406   |    | $C_{24}H_{30}N_4O_2$ | Oxydative              | No                | No   | Class 5 |
| 1.29 | DP418-2 |    | $C_{24}H_{26}N_4O_3$ | Oxydative<br>and light | Not<br>applicable | Yes* | Class 3 |
| 1.31 | DP384-1 |    | $C_{24}H_{24}N_4O$   | Light                  | Yes               | No   | Class 3 |
| 1.31 | DP384-2 |   | $C_{24}H_{24}N_4O$   | Light                  | Yes               | No   | Class 3 |
| 1.4  | DP382-1 |  | $C_{24}H_{22}N_4O$   | Light                  | No                | No   | Class 5 |
| 1.4  | DP382-2 |  | $C_{24}H_{22}N_4O$   | Light                  | No                | No   | Class 5 |
| 1.4  | DP382-3 |  | $C_{24}H_{22}N_4O$   | Light                  | No                | No   | Class 5 |
| 1.42 | DP398-2 |  | $C_{24}H_{22}N_4O_2$ | Light                  | No                | Yes* | Class 4 |

|      |         |                                                                                   |                      |       |    |      |         |
|------|---------|-----------------------------------------------------------------------------------|----------------------|-------|----|------|---------|
| 1.42 | DP398-3 | 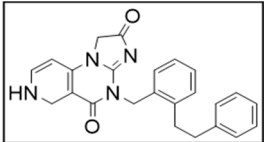 | $C_{24}H_{22}N_4O_2$ | Light | No | Yes* | Class 4 |
|------|---------|-----------------------------------------------------------------------------------|----------------------|-------|----|------|---------|

|      |         |                                                                                   |                      |       |    |      |         |
|------|---------|-----------------------------------------------------------------------------------|----------------------|-------|----|------|---------|
| 1.52 | DP398-1 | 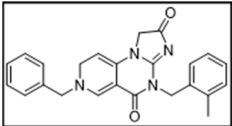 | $C_{24}H_{22}N_4O_2$ | Light | No | Yes* | Class 4 |
|------|---------|-----------------------------------------------------------------------------------|----------------------|-------|----|------|---------|

---

## Figures

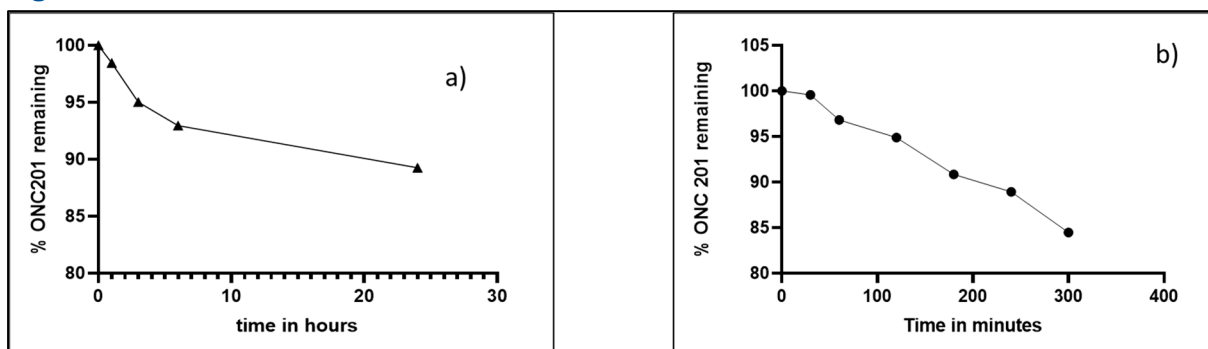

Figure S1: Degradation kinetics of ONC201. Inset (a) under photolytic conditions. Inset (b) under oxidizing conditions.

## LC-MS-HRMS spectral data of protonated ONC201

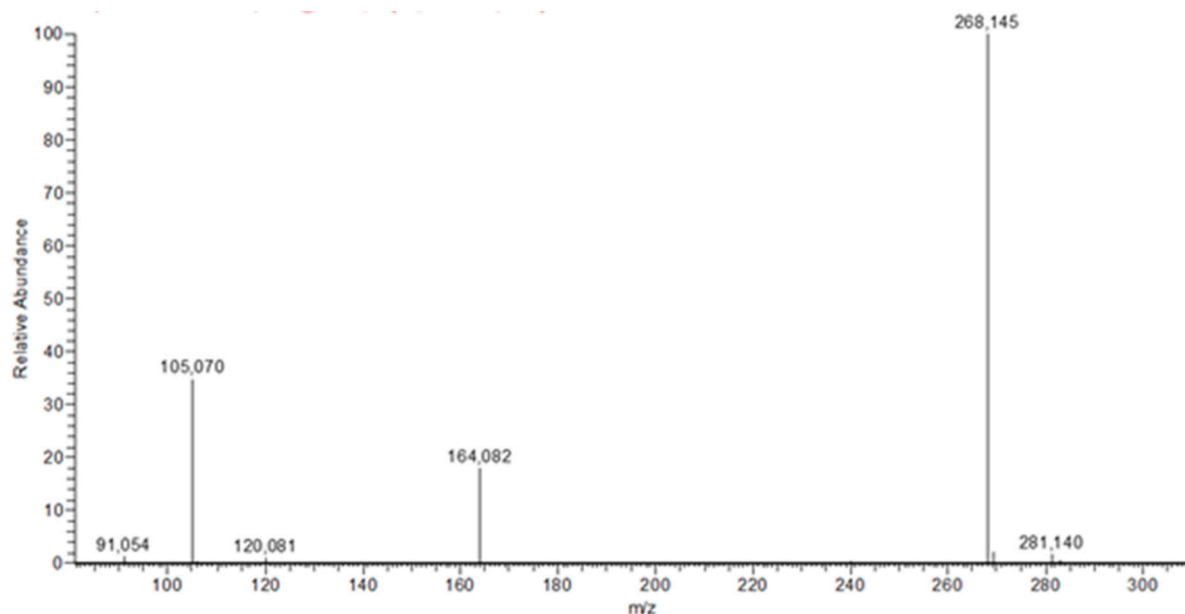

Figure S2: LC-MS-HRMS mass spectra of protonated ONC201

LC-MS-HRMS spectral data of the protonated degradation products (DP) formed under photolytic stress conditions

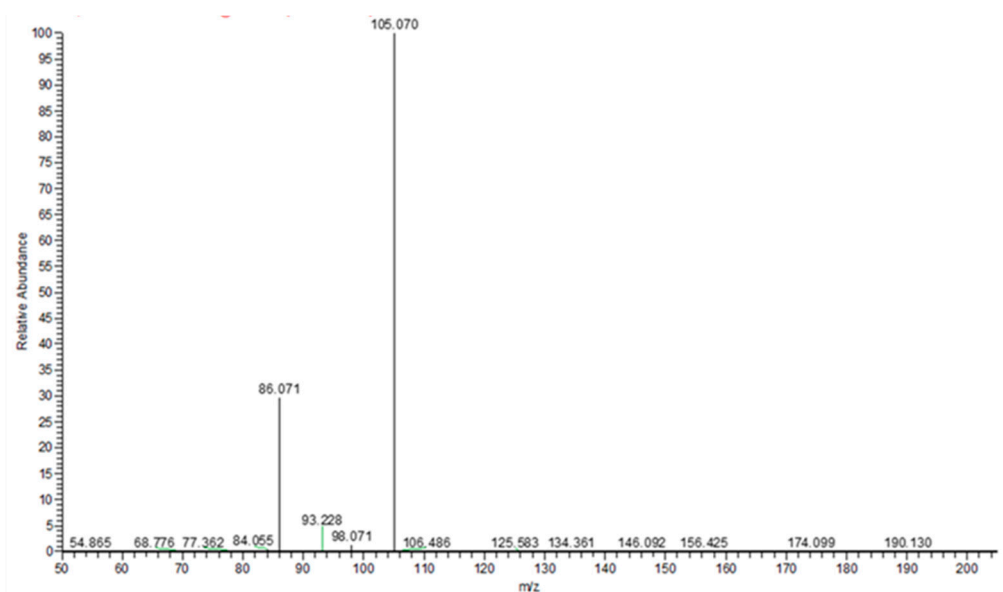

Figure S3: LC-MS-HRMS mass spectra of protonated DP189

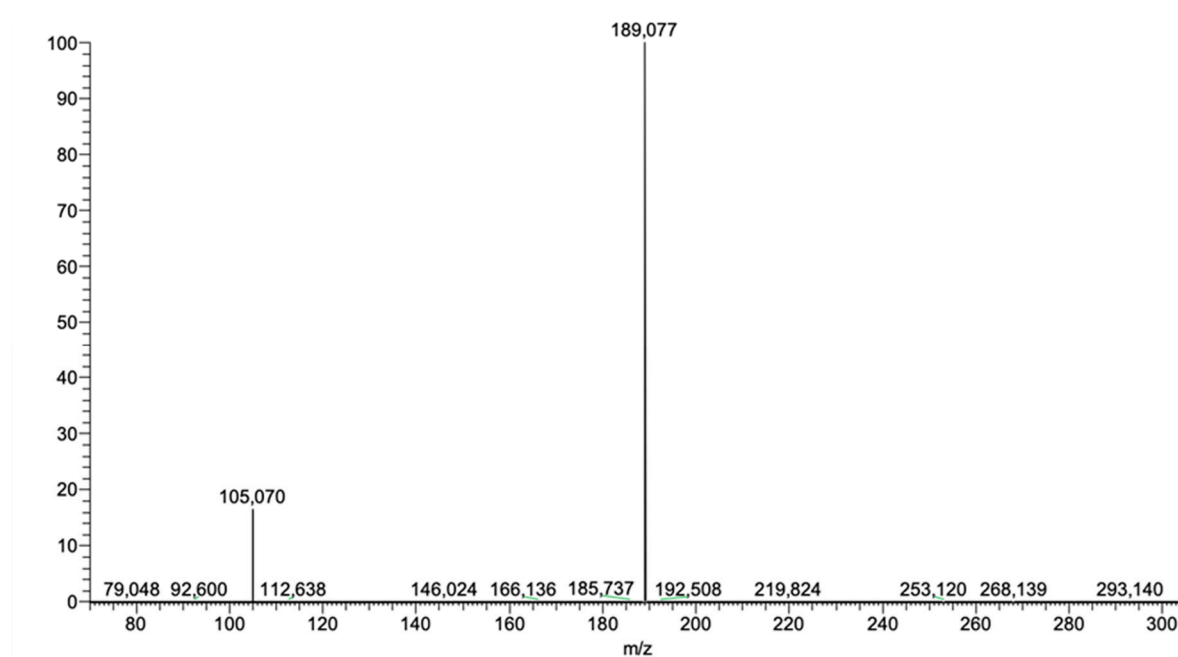

Figure S4: LC-MS-HRMS mass spectra of protonated DP292



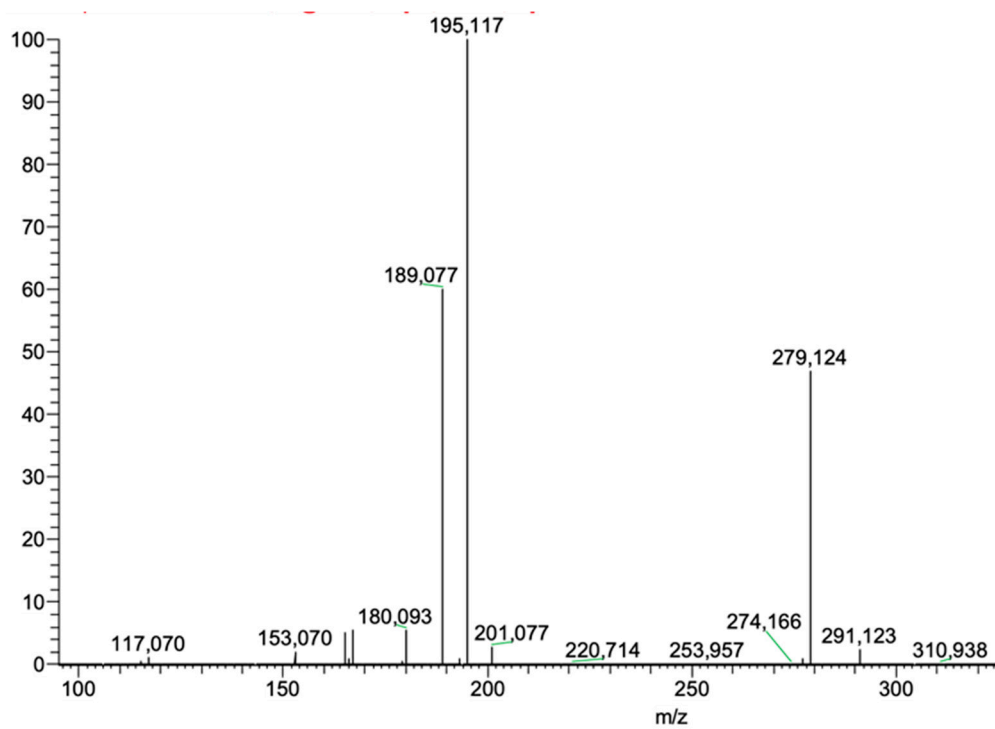

Figure S5: LC-MS-HRMS mass spectra of protonated DP382

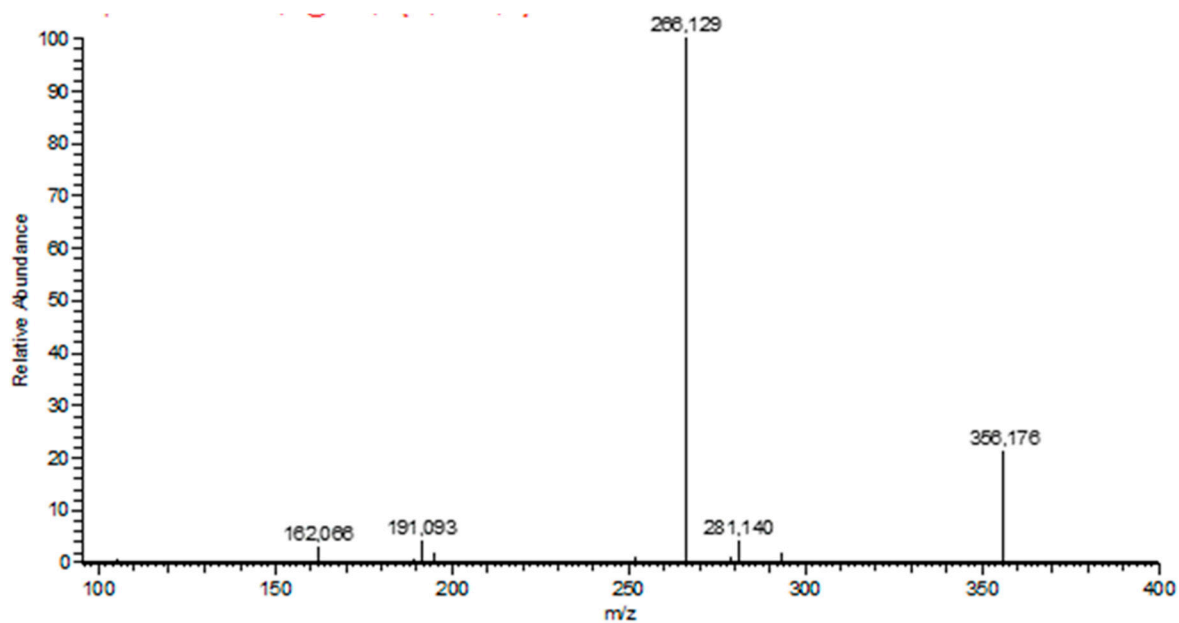

Figure S6: LC-MS-HRMS mass spectra of protonated DP384

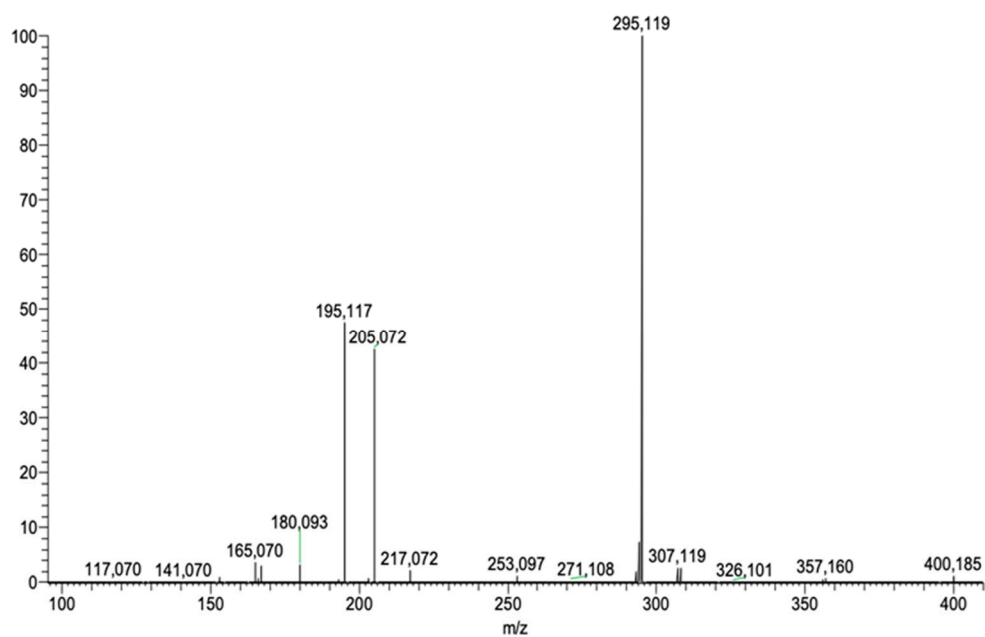

Figure S7: LC-MS-HRMS mass spectra of protonated DP398

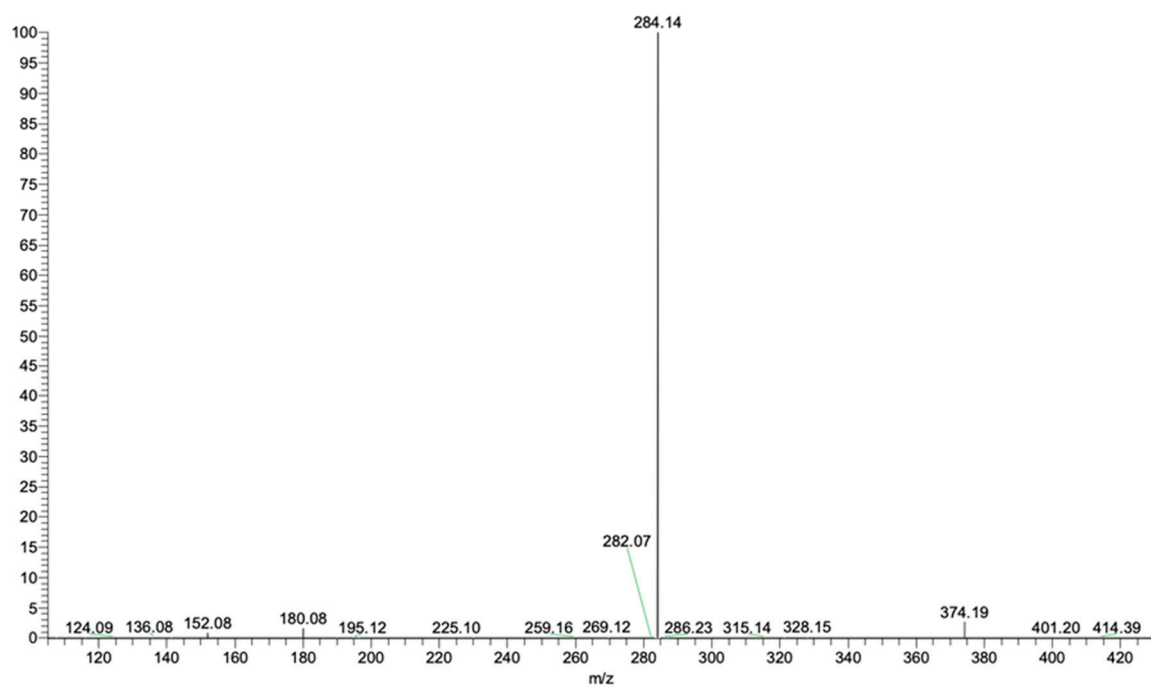

Figure S8: LC-MS-HRMS mass spectra of protonated DP418

LC-MS-HRMS spectral data of the protonated degradation products (DP) formed under oxidative stress conditions

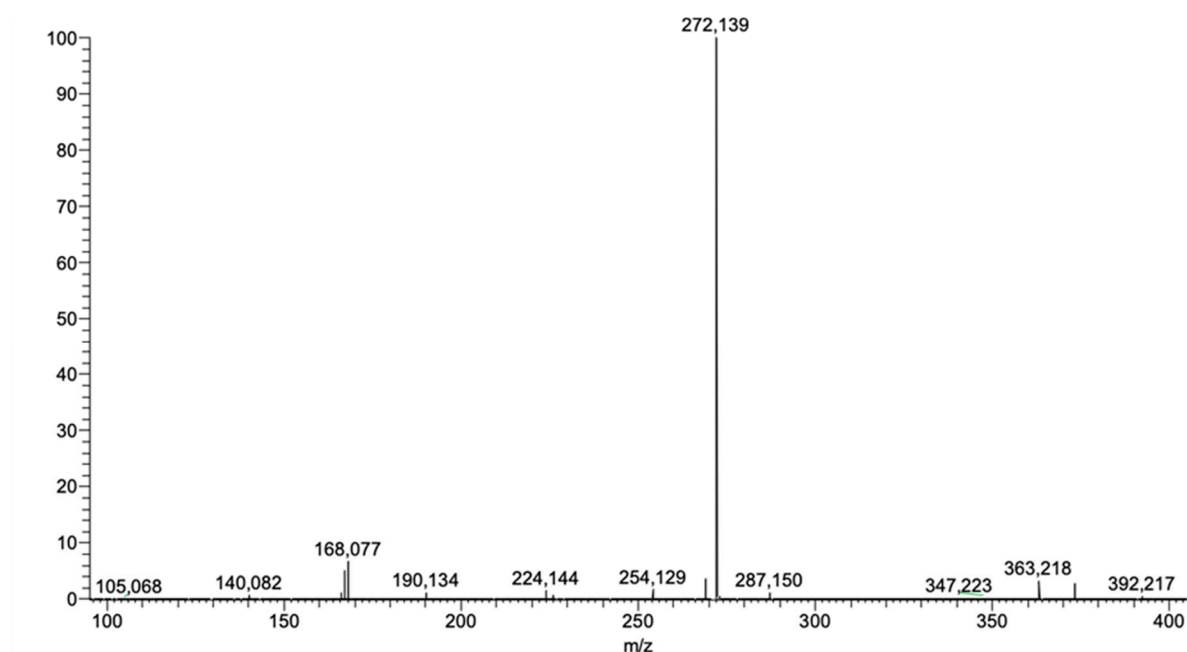

Figure S9: LC-MS-HRMS mass spectra of protonated DP390

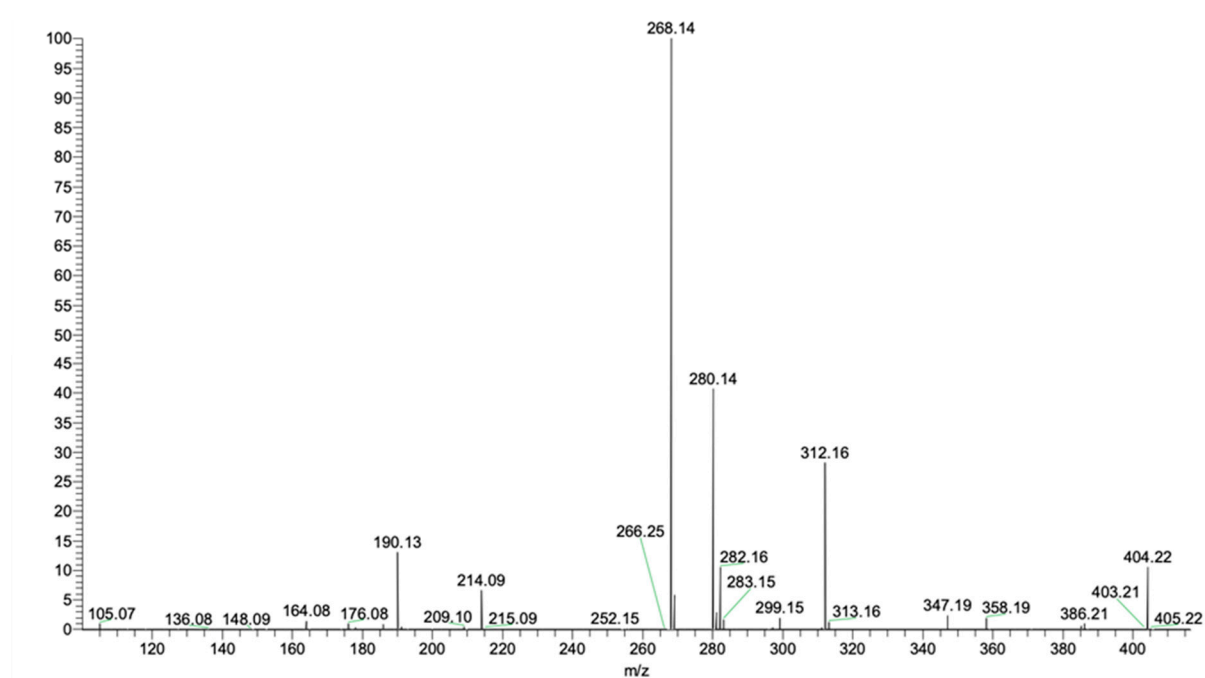

Figure S10: LC-MS-HRMS mass spectra of protonated DP402

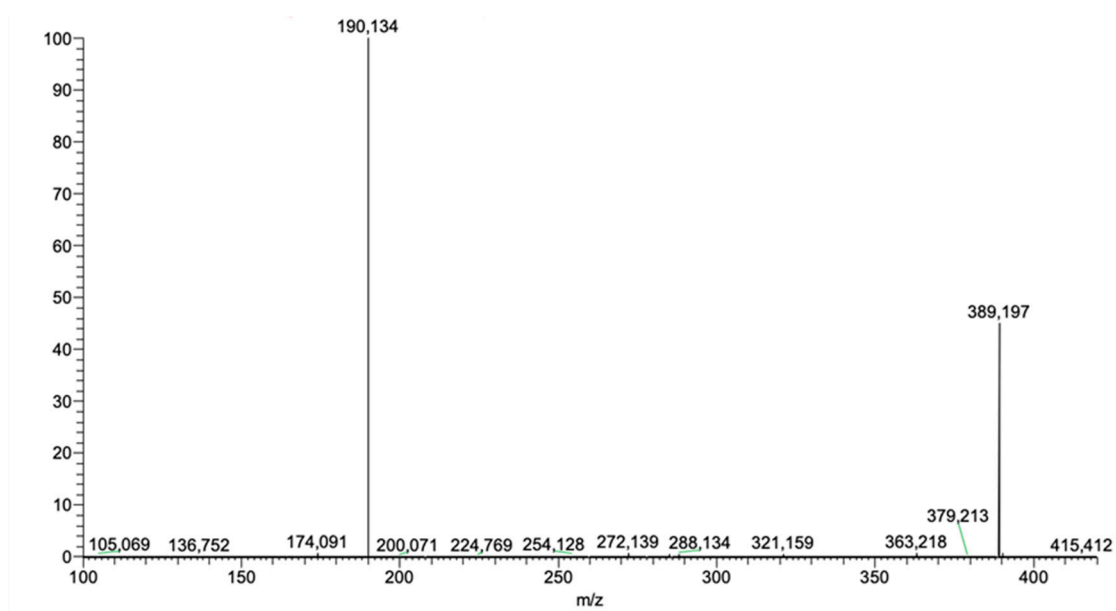

Figure S11: LC-MS-HRMS mass spectra of protonated DP406

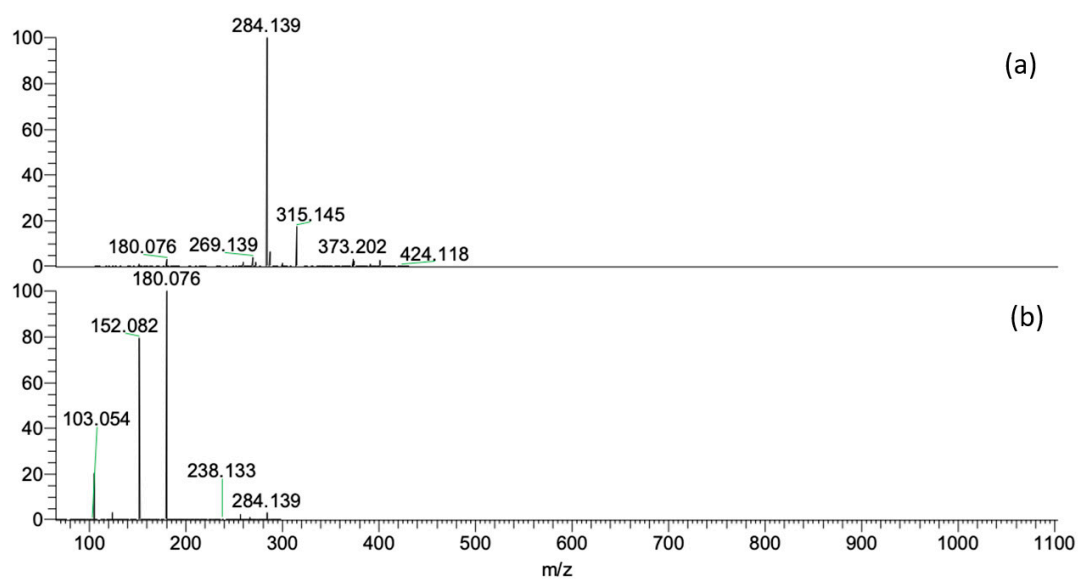

Figure S12: a. LC-MS-HRMS mass spectrum of protonated DP418 b. LC-MS<sup>2</sup>-HRMS mass spectrum of  $m/z$  284 of protonated DP418

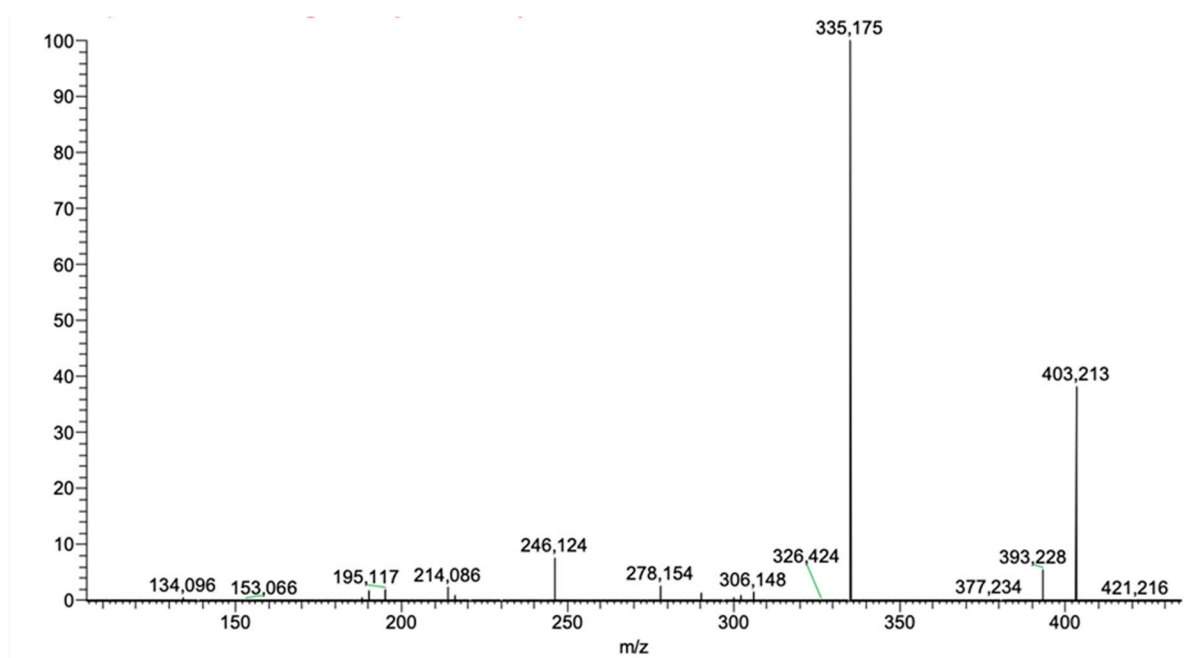

Figure S13: LC-MS-HRMS mass spectra of protonated DP420
